# Supplementary material for: 31P-Solid-State NMR Characterization and Catalytic Hydrogenation Tests of Novel heterogenized Iridium-Catalysts
Source: publisher site journal article supplement (doi:10.1515/zpch-2016-0837), 2016-10-27
Supplement: Supplementary file 1 [file zpch-2016-0837_suppl.pdf]

## Electronic Supporting Information (ESI)

### <sup>31</sup>P-Solid-State NMR Characterization and Catalytic Hydrogenation Tests of Novel heterogeneous Iridium- and Palladium-Catalysts

<sup>1</sup>Torsten Gutmann, <sup>1</sup>Safaa Alkhagani, <sup>1</sup>Niels Rothermel, <sup>2</sup>Hans-Heinrich Limbach, <sup>1</sup>Hergen Breitzke,  
<sup>1</sup>Gerd Buntkowsky\*

<sup>1</sup>Technische Universität Darmstadt, Eduard-Zintl-Institut für Anorganische und Physikalische Chemie,  
Alarich-Weiss-Str. 8, D-64287 Darmstadt, Germany  
eMail: gerd.buntkowsky@chemie.tu-darmstadt.de

<sup>2</sup>Freie Universität Berlin, FB Biologie, Chemie, Pharmazie,  
Takustr. 3, D-14195 Berlin, Germany

*Dedicated to Prof. Kev Salikhov on the occasion of his 80th birthday.*

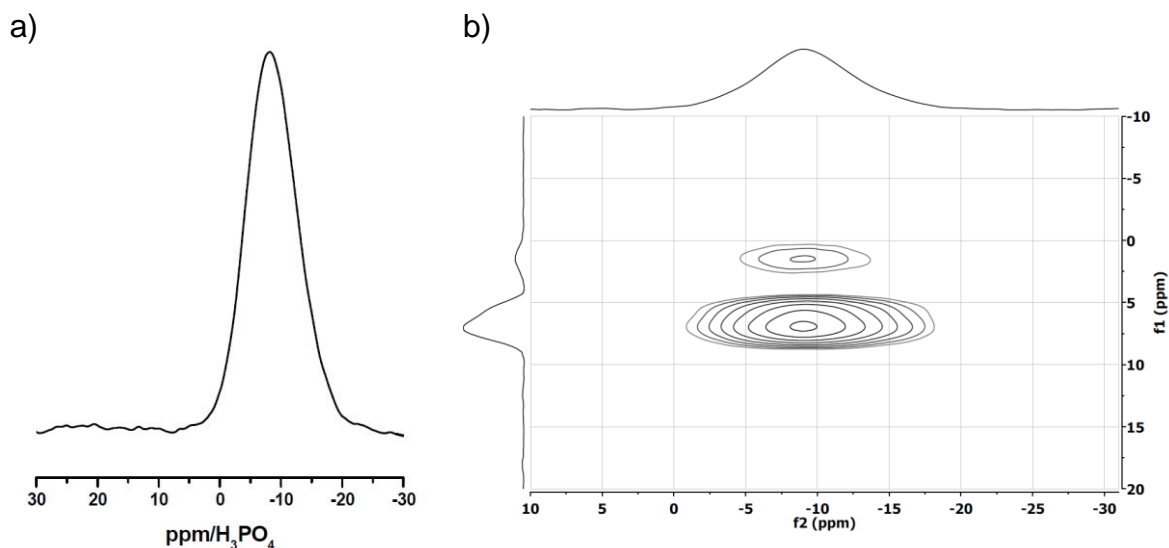

**Figure S1.** a) <sup>31</sup>P CP-MAS NMR spectrum of **Si-PB** at 10 KHz spinning. b) Two-dimensional <sup>31</sup>P-<sup>1</sup>H HETCOR of the **Si-PB** structure. f1 is the <sup>1</sup>H dimension, f2 is the <sup>31</sup>P dimension. The splitting in the f1-dimension proves that the phosphorous is part of the polymeric shell (adapted from ref. <sup>38</sup>).

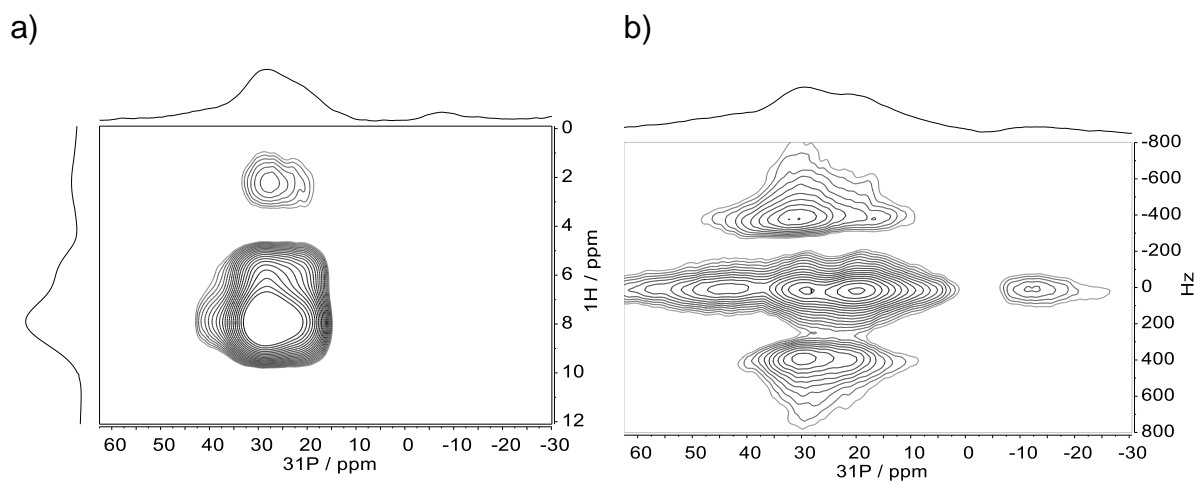

**Figure S2:** 2D spectra of a **Si-PB-Rh** sample for comparison: a)  $^{31}\text{P}$ - $^1\text{H}$  HETCOR with (f1)  $^1\text{H}$  spectrum and (f2). b)  $^{31}\text{P}$  spectrum  $J$ -resolved  $^{31}\text{P}$ - $^{31}\text{P}$  with (f1)  $J$  coupling in Hz and (f2)  $^{31}\text{P}$  1D spectrum. (spectrum refers to ref. 38)

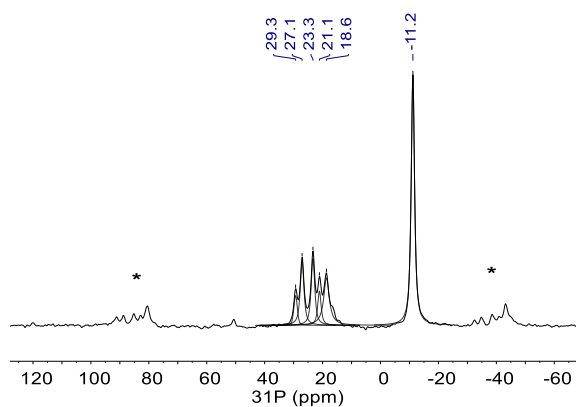

**Figure S3:**  $^{31}\text{P}$  CP-MAS spectrum of the neat  $\text{IrCl}(\text{PPh}_3)_3$  measured at 10 kHz spinning rate. *Note:* Spinning side bands are marked with asterisks.

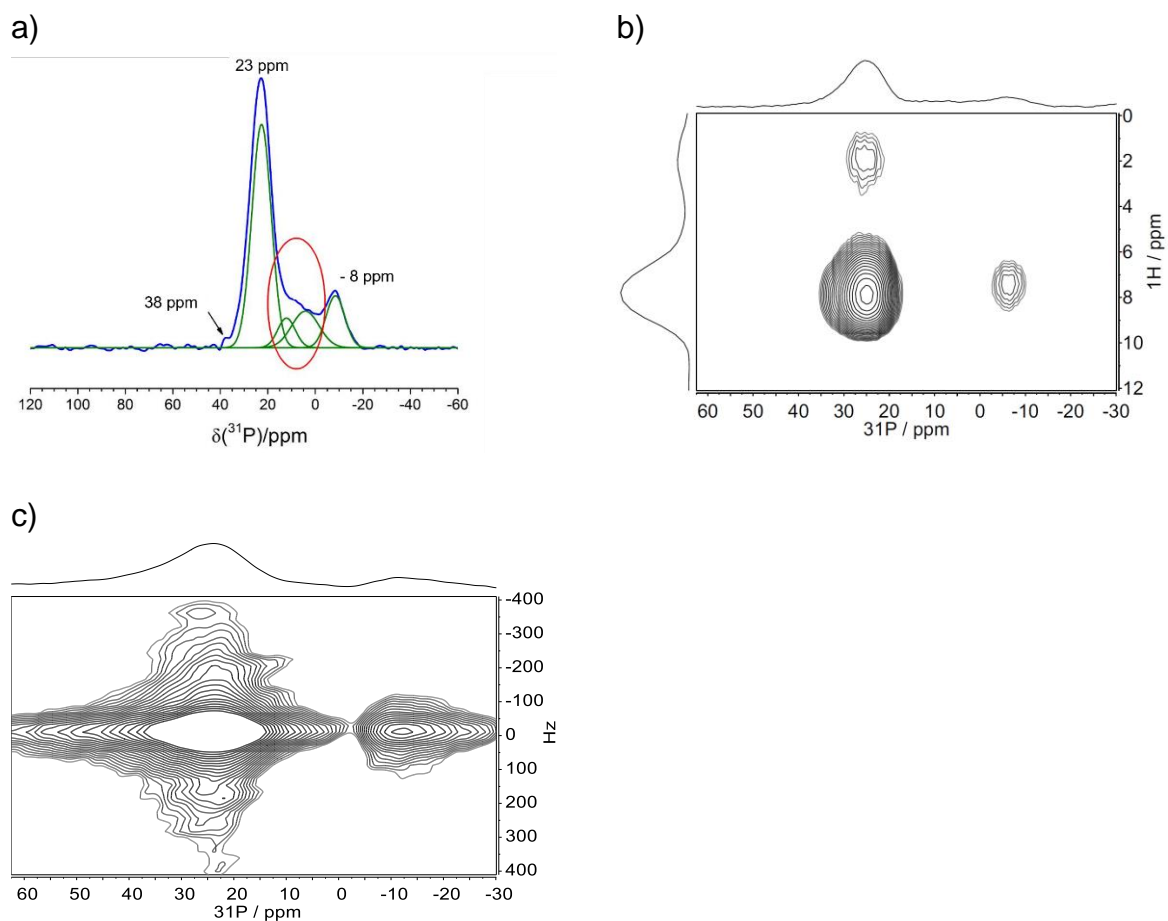

**Figure S4:**  $^{31}\text{P}$  CP-MAS spectrum of **Si-PB-Ir** synthesized at 85 °C. (a) 2D spectra for **Si-PB-Ir** sample synthesized at 85 °C:  $^{31}\text{P}$ - $^1\text{H}$  HETCOR with (f1)  $^1\text{H}$  spectrum and (f2)  $^{31}\text{P}$  spectrum (b), and  $^{31}\text{P}$  J-resolved spectra (f1) J-coupling in Hz and (f2)  $^{31}\text{P}$  1D spectrum (c).

*Note:* Spectra were recorded at 10 kHz spinning. The spectrum (a) was measured employing an additional TOSS sequence<sup>67</sup> to suppress the spinning sidebands.
